# Supplementary material
Source: PubMed Central journal article supplement (PMC4143591)
Supplement: NIHMS59962-supplement-Supplement1.pdf [file NIHMS59962-supplement-Supplement1.pdf]

## Supplementary Appendix

This appendix has been provided by the authors to give readers additional information about their work.

Supplement to: Ashley EA, Dhorda M, Fairhurst RM, et al. Spread of artemisinin resistance in *Plasmodium falciparum* malaria. N Engl J Med 2014;371:411-23. DOI: 10.1056/NEJMoa1314981

# Spread of artemisinin resistance in falciparum malaria SUPPLEMENTARY APPENDIX

---

|                                                                                                                                                   |    |
|---------------------------------------------------------------------------------------------------------------------------------------------------|----|
| 1. Supplementary METHODS .....                                                                                                                    | 2  |
| 1.1 Laboratory procedures: .....                                                                                                                  | 2  |
| 1.2 Parasitemia calculation .....                                                                                                                 | 2  |
| 1.3 Sequencing of the <i>P. falciparum kelch13</i> gene (PF3D7_1343700) .....                                                                     | 2  |
| 1.4 Table S1 – PCR primers .....                                                                                                                  | 3  |
| 2. Supplementary Figures: .....                                                                                                                   | 4  |
| 2.1 Figure S1 Trial profile .....                                                                                                                 | 4  |
| Figure S2a Forest plot to show the effect of the higher artesunate dose on parasite clearance half-life .....                                     | 5  |
| 2.2 Figure S2b. Change in PCT <sub>1/2</sub> with the higher (4mg/kg) artesunate dose .....                                                       | 5  |
| 2.3 Figure S3a Relationship of prevalence of admission patent gametocytemia and PCT <sub>1/2</sub> by study site.....                             | 6  |
| 2.4 Figure S3b Relationship of development of patent gametocytemia in the week after starting treatment to PCT <sub>1/2</sub> by study site. .... | 6  |
| 3. Supplementary RESULTS Tables.....                                                                                                              | 7  |
| 3.1 Table S2 Gametocytemia detected by microscopy.....                                                                                            | 7  |
| 3.2 Table S3 Change in hematocrit (Hct) and prevalence of anemia.....                                                                             | 7  |
| 3.3 Table S4 Patients who vomited study drugs during first 3 days of treatment .....                                                              | 8  |
| 3.4 Table S4 Adverse events up to day 7 .....                                                                                                     | 9  |
| 3.5 Table S5 Serious Adverse events occurring at any time during follow-up .....                                                                  | 11 |
| 4. Study Drugs and doses:.....                                                                                                                    | 12 |
| 4.1 Table S6 Artesunate dosing table: .....                                                                                                       | 13 |
| 4.2 Study Artesunate certificates of analysis.....                                                                                                | 14 |
| 5. List of Ethics Committees/Institutional Review Boards which approved the protocol: .....                                                       | 16 |
| 6. References .....                                                                                                                               | 17 |

## 1. SUPPLEMENTARY METHODS

### 1.1 Laboratory procedures:

Hematocrit was estimated using the Hawksley® microhematocrit centrifuge method. Slides were stained with Giemsa or Field's stain and parasite counts expressed per 1000 red blood cells or 500 white blood cells (WBC).

### 1.2 Parasitemia calculation

Parasitemia = N parasites per 1000 red blood cells on the thin smear x Hct x 125.6

Or

Parasitaemia- N parasites per N White blood cells on the thick smear by WBC count (or 8000 if unavailable) / N

### 1.3 Sequencing of the *P. falciparum kelch13* gene (PF3D7\_1343700)

Admission blood samples were anticoagulated in EDTA, washed in PBS and filtered through a cellulose CF11 column to deplete host leucocytes (Venkatesan et al. 2012). Genomic DNA was extracted using QIAamp® DNA Mini Kit (QIAGEN, Germany), following the manufacturer's instructions. Eluted genomic DNA samples were quantified by PicoGreen analysis and quantitative real-time PCR using the Applied Biosystems StepOne RT-PCR system and frozen at -80°C. Samples with more than 50ng DNA and less than 80% human DNA contamination entered Illumina sequencing (Illumina Genome Analyzer II) following the manufacturer's standard protocols. Definition of single-nucleotide polymorphisms (SNPs) was based on analytical approaches described elsewhere (Manske et al. 2012). Filtering was adapted to the heteroallelic nature of relevant polymorphisms in the *kelch13* gene (Ariey et al. 2014), with calls at SNPs requiring one sequence read for the reference allele and two reads for the alternative allele (three if there were 50 or more total reads covering that position). In addition, potential SNPs where the alternative allele was not supported by at least 5 reads in at least one sample, SNPs that were not biallelic and polymorphisms in the *kelch13* low-complexity region (corresponding to amino acid positions 133-143) were not included. Because of the complex effect on phenotype, samples with heterozygosity at one or more positions were also excluded from genotype-phenotype analyses, as were samples with missingness at any of the *kelch13* SNP positions.

Samples not meeting the Illumina sequencing entry criteria were sequenced by standard dideoxy sequencing of PCR products. These were obtained by nested PCR, the initial PCR (nest 1) amplifying the whole gene (spanning 2438 bases) and three nested PCR reactions (nest 2, fragments a-c) each amplifying a fragment (approximately 850 – 950 bases) of the *kelch13* gene. PCR reaction conditions consisted of a final reaction volume of 100µl containing 10mM Tris-HCl (pH 8.3), 50mM KCl, 2mM MgCl<sub>2</sub> (3mM for fragment c), 125µM 4-deoxynucleotide triphosphate (dNTPs), 250nM oligonucleotide primers (see Supplementary Table), 2µl of each genomic DNA template, and 0.4 units Platinum® *Taq* DNA polymerase (Invitrogen, USA). The cycling parameters were pre-denaturation 95°C for 5 min, followed by 25 (nest 1) or 35 (nest 2) PCR cycles involving denaturation at 94°C for 1 min, annealing at 58°C for 2 minutes and extension at 72°C for 2 minutes, with post-extension at 72°C for 7 min, using a MyCycler™ thermal cycler (Bio-Rad Laboratories, U.S.A.). Purified PCR products were sequenced at Macrogen, Republic of Korea and analysed using BioEdit version 7.1.3.0. using the 3D7 *kelch13* sequence as reference (Accession: XM\_001350122.1).

#### 1.4 Table S1 – PCR primers

| Reaction | Fragment   | Primer name                | Sequence (5'>3')                                     | Product (bp) |
|----------|------------|----------------------------|------------------------------------------------------|--------------|
| Nest 1   | Whole gene | K13_c.-155F<br>K13_c.2283R | AACAAGGCGTAAATATTCGTGT<br>TGTGCATGAAAATAAATATTAAGAAG | 2438         |
| Nest 2   | Fragment a | K13_c.-155F<br>K13_c.719R  | AACAAGGCGTAAATATTCGTGT<br>TCTCGAATAAAATTCATTTGTGTCTT | 874          |
| Nest 2   | Fragment b | K13_c.614F<br>K13_c.1464R  | TTGAAACGGAATTAAGTGATGC<br>CAATACAGCACTTCCAAAATAAGC   | 851          |
| Nest 2   | Fragment c | K13_c.1344F<br>K13_c.2283R | AGGTGGATTTGATGGTGTAGAA<br>TGTGCATGAAAATAAATATTAAGAAG | 940          |

## 2. SUPPLEMENTARY FIGURES:

### 2.1 Figure S1 Trial profile

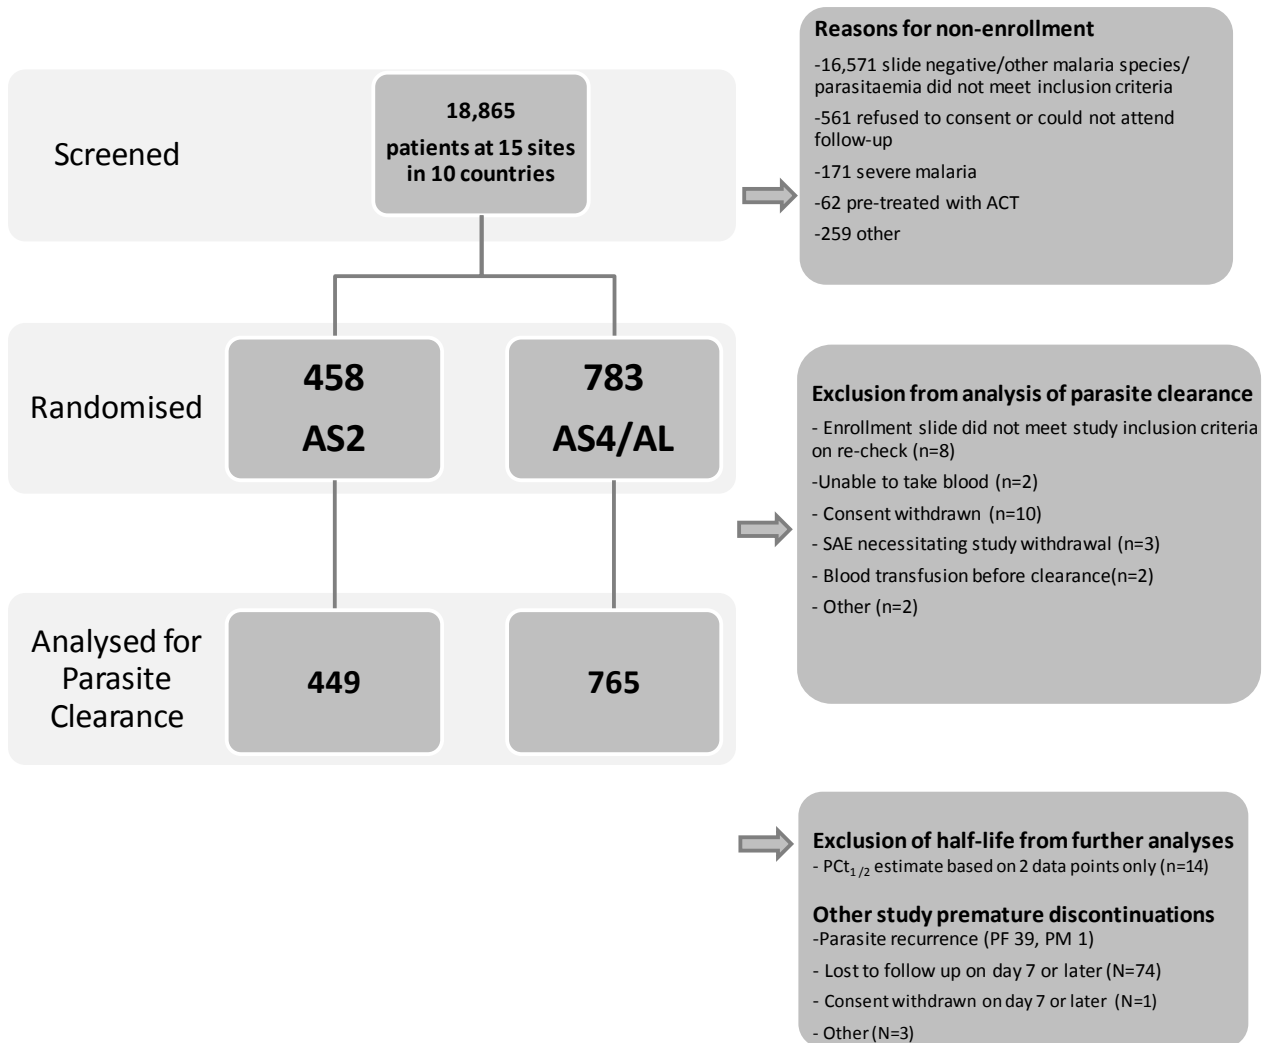

#### Notes:

AS2= Artesunate 2mg/kg/day dosing arm; AS4=Artesunate 4mg/kg/day dosing arm; AL= artemether lumefantrine (Kinshasa site only)

ACT= Artemisinin based combination therapy

PCT<sub>1/2</sub> = parasite clearance half-life in hours

PF= *Plasmodium falciparum*; PM = *Plasmodium malariae*

**Figure S2a Forest plot to show the effect of the higher artesunate dose on parasite clearance half-life**

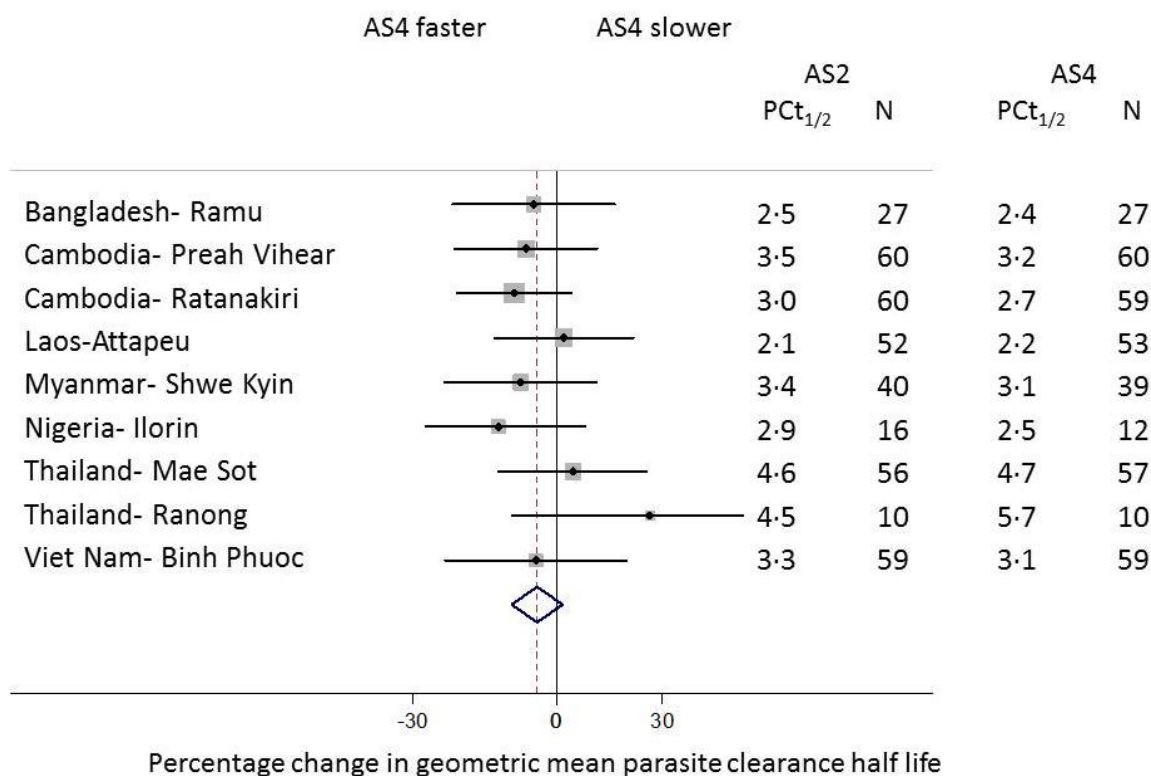

Note: Pct<sub>1/2</sub> = parasite clearance half-life in hours. AS2 : artesunate 2mg/kg, AS4 : artesunate 4mg/kg

**2.2 Figure S2b. Change in Pct<sub>1/2</sub> with the higher (4mg/kg) artesunate dose**

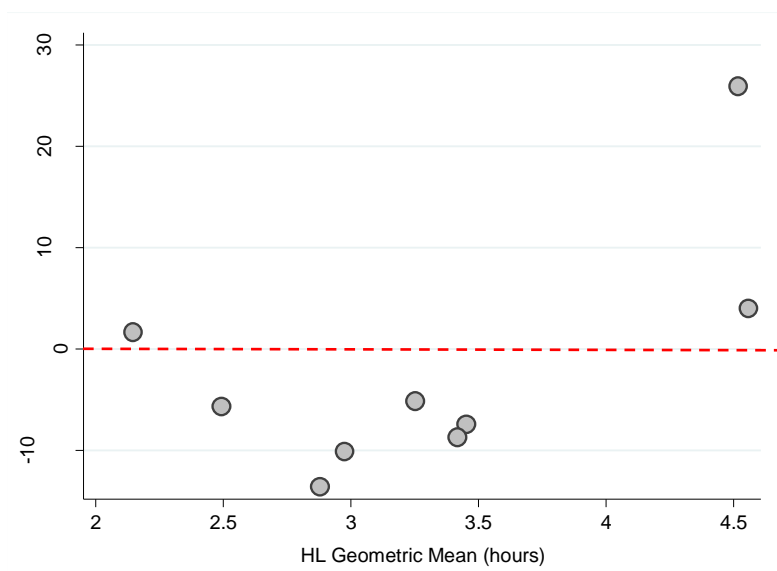

For intermediate geometric mean Pct<sub>1/2</sub> values (2.5 to 3.5 hours for 2mg/kg artesunate) the higher dose (4mg/kg) accelerated parasite clearance, but there was no overall significant difference in geometric mean Pct<sub>1/2</sub> between artesunate 2mg/kg and 4mg/kg groups. Dots represent from left to right: Attapeu (Laos), Ramu (Bangladesh), Ilorin (Nigeria), Ratanakiri (Cambodia), Binh Phuoc (Viet Nam), Shwe Kyin (Myanmar), Preah Vihear (Cambodia), Ranong (Thailand), Mae Sot(Thailand).

**2.3 Figure S3a Relationship of prevalence of admission patent gametocytemia and  $PCt_{1/2}$  by study site**

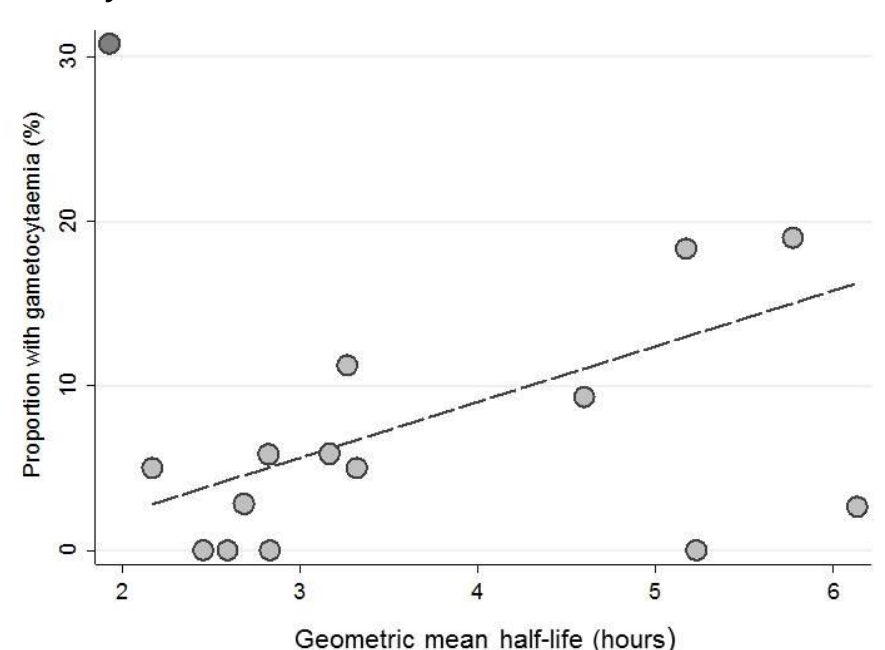

Note: One dot represents one study site. Dark gray dot = Kinshasa DRC (excluded from the correlation)

**2.4 Figure S3b Relationship of development of patent gametocytemia in the week after starting treatment to  $PCt_{1/2}$  by study site.**

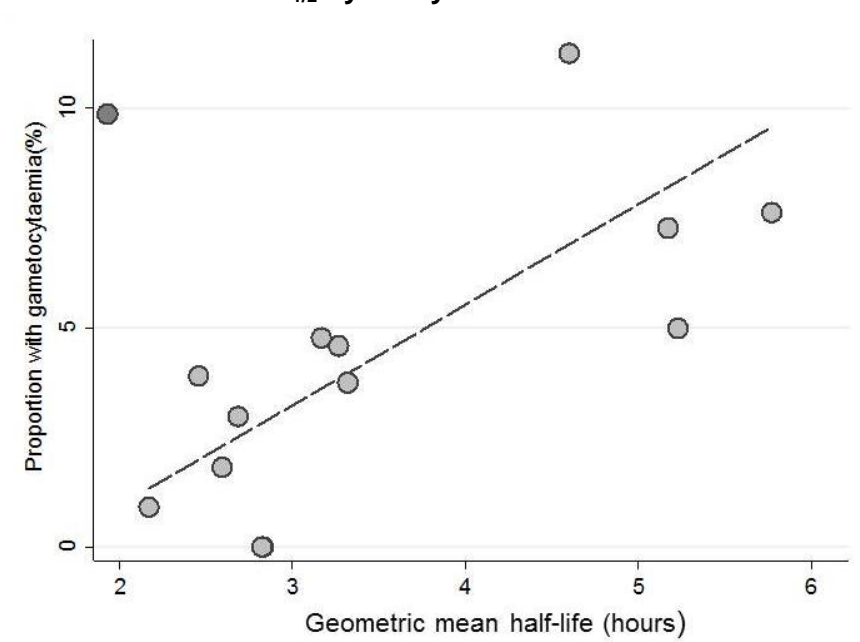

Note: Dark gray dot = Kinshasa DRC (excluded from the correlation). One dot represents one study site. Patients in Srisaket, Thailand were excluded from the analysis as they also received single dose primaquine.

### 3. SUPPLEMENTARY RESULTS TABLES

#### 3.1 Table S2 Gametocytemia detected by microscopy

|    | Country    | Site         | Gametocytemia<br>Day 0 N (%) | Day 7       | Day 14      |
|----|------------|--------------|------------------------------|-------------|-------------|
| 1  | India      | Jalpaiguri   | 0/1 (0)                      | 0           | 0           |
| 2  | Bangladesh | Ramu         | 0/56 (0)                     | 1/47 (2)    | 0/45 (0)    |
| 3  | Myanmar    | Shwe Kyin    | 9/80 (11)                    | 6/80 (8)    | 2/80 (3)    |
| 4  | Thailand   | Mae Sot      | 11/118 (9)                   | 7/118 (6)   | 2/112 (2)   |
| 5  | Thailand   | Srisaket     | 1/38 (3)                     | <i>a</i>    | <i>a</i>    |
| 6  | Laos       | Attapeu      | 6/120 (5)                    | 1/105 (1)   | 0/71 (0)    |
| 7  | Cambodia   | Pailin       | 19/100 (19)                  | 10/95 (11)  | 7/84 (8)    |
| 8  | Cambodia   | Preah Vihear | 6/120 (5)                    | 6/118 (5)   | 4/119 (3)   |
| 9  | Cambodia   | Ratanakiri   | 7/120 (6)                    | 5/112 (4)   | 0/101 (0)   |
| 10 | Cambodia   | Pursat       | 22/120 (18)                  | 17/109 (16) | 12/100 (12) |
| 11 | Vietnam    | Binh Phuoc   | 7/119 (6)                    | 7/110 (6)   | 4/101 (4)   |
| 12 | Thailand   | Ranong       | 0/23 (0)                     | 1/20 (5)    | 1/19 (0)    |
| 13 | Nigeria    | Ilorin       | 1/35 (3)                     | 1/20 (5)    | 0/19 (0)    |
| 14 | DRC        | Kinshasa     | 36/117 (31)                  | 18/116 (16) | 6/96 (6)    |
| 15 | Kenya      | Pingilikani  | 0/58 (0)                     | 1/47 (2)    | 0/45 (0)    |

*a* Srisaket not included as patients were given primaquine according to local guidelines

#### 3.2 Table S3 Change in hematocrit (Hct) and prevalence of anemia

|    | Country    | Site         | Day3-Day0<br>Change in Hct<br>(%) | Day 14-Day 0<br>Change in Hct<br>(%) | Day 0<br>Anemia<br>n/N (%) | Day 7<br>Anemia | Day 14<br>Anemia |
|----|------------|--------------|-----------------------------------|--------------------------------------|----------------------------|-----------------|------------------|
| 1  | India      | Jalpaiguri   | -                                 | -3                                   | 1/1 (100)                  | 1/1 (100)       | 1/1 (100)        |
| 2  | Bangladesh | Ramu         | -3.7(2.7)                         | -2 (2.8)                             | 5/56 (9)                   | 11/53 (21)      | 11/53 (21)       |
| 3  | Myanmar    | Shwe Kyin    | -2.9(3.8)                         | -1.4 (4.2)                           | 21/80 (26)                 | 32/80 (40)      | 21/79 (27)       |
| 4  | Thailand   | Mae Sot      | -4.7(4.3)                         | -3.4 (5.7)                           | 19/117 (16)                | 41/115 (36)     | 40/112 (36)      |
| 5  | Thailand   | Srisaket     | -2.9(5.4)                         | 0.1 (6.2)                            | 4/38 (11)                  | 3/33 (9)        | 3/36 (8)         |
| 6  | Laos       | Attapeu      | -3.0(3.1)                         | -2.4 (3.4)                           | 17/120 (14)                | 47/116 (41)     | 34/110 (31)      |
| 7  | Cambodia   | Pailin       | -2.8(3.2)                         | -2.1 (3.8)                           | 19/100 (19)                | 27/97 (28)      | 22/91 (24)       |
| 8  | Cambodia   | Preah Vihear | -3.1(3.6)                         | -1.8 (4.2)                           | 44/120 (37)                | 61/120 (51)     | 43/120 (36)      |
| 9  | Cambodia   | Ratanakiri   | -4.0(2.9)                         | -2.8 (4.2)                           | 31/120 (26)                | 67/119 (56)     | 51/114 (45)      |
| 10 | Cambodia   | Pursat       | -3.5(3.8)                         | -3.4 (5.2)                           | 25/120 (21)                | 49/118 (42)     | 37/115 (32)      |
| 11 | Vietnam    | Binh Phuoc   | -4.5(2.8)                         | -3.2 (3.4)                           | 10/120 (8)                 | 41/117 (35)     | 31/114 (27)      |
| 12 | Thailand   | Ranong       | -4.5(2.7)                         | -2.8 (3.1)                           | 2/23 (9)                   | 4/22 (18)       | 2/22 (14)        |
| 13 | Nigeria    | Ilorin       | -1.1(3.2)                         | 0.3(3.8)                             | 18/36 (50)                 | 17/27 (63)      | 12/27 (44)       |
| 14 | DRC        | Kinshasa     | -2.3(3.6)                         | 2.4(4.9)                             | 80/118 (68)                | 84/118 (72)     | 48/112 (43)      |

Anaemia defined as Hb<11g/dL or <10g/dL in children under 5y (WHO. Haemoglobin concentrations for the diagnosis of anaemia and assessment of severity. Accessed 25<sup>th</sup> November 2013 at <http://www.who.int/vmnis/indicators/haemoglobin.pdf>.)

Hematocrit = 5.62 + 2.60 \* Hemoglobin. (Lee SJ, Stepniewska K, Anstey N et al. The relationship between the haemoglobin concentration and the haematocrit in *Plasmodium falciparum* malaria. Malar J. 2008; 7: 149. doi:10.1186/1475-2875-7-149.)



### 3.3 Table S4 Patients who vomited study drugs during first 3 days of treatment

| Day 0     | Treatment | Day 1     | Treatment |
|-----------|-----------|-----------|-----------|
| BD001-024 | AS2       | LA001-012 | AS2       |
| KE001-120 | AS2       | LA001-021 | AS4       |
| KE001-134 | AS2       | TH004-026 | AS4       |
| KE001-138 | AS2       | TH004-066 | AS4       |
| KH004-055 | AS4       | CD001-011 | AL dose 3 |
| LA001-067 | AS2       | CD001-112 | AL dose 3 |
| NG001-026 | AS4       |           |           |
| NG001-036 | AS2       |           |           |
| TH004-012 | AS4       |           |           |
| CD001-042 | AL dose 1 |           |           |
| CD001-002 | AL dose 2 |           |           |
| CD001-012 | AL dose 2 |           |           |
| CD001-112 | AL dose 2 |           |           |

**Note:**

AS2 Artesunate 2mg/kg  
AS4 Artesunate 4mg/kg  
AL Artemether-lumefantrine  
BD001: Bangladesh-Ramu  
KE001: Kenya- Pingilikani  
LA001: Laos-Attapeu  
NG001: Nigeria-Ilorin  
TH004:Thailand-Mae Sot  
CD001: DRC-Kinshasa

No subjects vomited their medication on day 2

### 3.4 Table S4 Adverse events up to day 7

| Country    | Site         | Initial treatment | Abdominal pain | Anorexia  | Blurred vision | Diarrhea  | Dyspnea  | hearing difficulty | Dizziness  | Headache  | Itch      | Joint Pain | Muscle Pain | Nausea     | Palpitations | Skin rash | Fatigue   | Vomiting  |
|------------|--------------|-------------------|----------------|-----------|----------------|-----------|----------|--------------------|------------|-----------|-----------|------------|-------------|------------|--------------|-----------|-----------|-----------|
| Bangladesh | Ramu         | AS 2              | 1/25 (4)       | 0/8       | 0/27           | 0/27      | 1/27     | 0/27               | 1/10 (10)  | 1/6 (1)   | 0/27      | 0/16       | 1/10 (10)   | 0/17       | 0/26         | 0/27      | 0/2       | 1/21 (5)  |
| Bangladesh | Ramu         | AS 4              | 1/23 (4)       | 1/15 (7)  | 0/26           | 0/25      | 0/26     | 0/26               | 1/13 (8)   | 1/1 (100) | 0/26      | 1/17 (6)   | 2/9 (22)    | 0/21       | 0/25         | 0/26      | 2/3 (67)  | 0/23      |
| Myanmar    | Shwe Kyin    | AS 2              | 0/37           | 0/40      | 0/40           | 0/40      | 0/40     | 0/40               | 1/38 (3)   | 0/38      | 0/40      | 0/40       | 0/40        | 0/40       | 0/40         | 0/40      | 0/40      | 0/39      |
| Myanmar    | Shwe Kyin    | AS 4              | 0/40           | 0/40      | 0/40           | 0/40      | 0/40     | 0/40               | 1/36 (3)   | 0/40      | 0/40      | 0/38       | 0/39        | 0/40       | 0/40         | 0/40      | 0/40      | 0/38      |
| Thailand   | Mae Sot      | AS 2              | 11/49 (22)     | 7/23 (30) | 0/53           | 3/57 (5)  | 0/54     | 1/57 (2)           | 6/15 (40)  | 0/2       | 2/57 (4)  | 4/15 (27)  | 7/22 (32)   | 8/36 (22)  | 7/40 (18)    | 0/59      | 7/37 (19) | 4/43 (9)  |
| Thailand   | Mae Sot      | AS 4              | 9/48 (19)      | 8/27 (30) | 2/58 (3)       | 5/55 (9)  | 0/59     | 1/57 (2)           | 10/17 (59) | 0/2       | 4/58 (7)  | 4/19 (21)  | 8/27 (30)   | 11/43 (26) | 6/43 (14)    | 1/60 (2)  | 5/38 (13) | 5/48 (10) |
| Thailand   | Srisaket     | AS 4              | 0/36           | 0/31      | 0/38           | 1/38 (3)  | 0/38     | 0/38               | 3/26 (12)  | 3/3 (100) | 0/38      | 0/36       | 4/7 (57)    | 6/30 (20)  | 0/37         | 0/38      | 2/24 (8)  | 2/35 (6)  |
| Laos       | Attapeu      | AS 2              | 0/28           | 1/4 (25)  | 0/31           | 1/47 (2)  | 0/33     | 0/39               | 3/6 (50)   | -         | 0/58      | 2/16 (13)  | 2/14 (14)   | 1/22 (5)   | 0/17         | 0/59      | -         | 0/39      |
| Laos       | Attapeu      | AS 4              | 1/34 (3)       | 1/3 (33)  | 0/32           | 2/42 (5)  | 0/27     | 0/41               | 1/4 (25)   | -         | 0/59      | 0/18       | 1/11 (9)    | 2/23 (10)  | 0/17         | 0/58      | 0/2       | 0/41      |
| Cambodia   | Pailin       | AS 4              | 8/76 (11)      | 4/33 (12) | 5/87 (6)       | 2/98 (2)  | 3/99 (3) | 4/88 (5)           | 17/47 (36) | 1/2 (50)  | 0/99      | 1/22 (5)   | 3/46 (7)    | 4/52 (8)   | 1/91 (1)     | 1/98 (1)  | 9/13 (69) | 1/86 (1)  |
| Cambodia   | Preah Vihear | AS 2              | 5/33 (15)      | 6/24 (25) | 5/29 (17)      | 2/54 (4)  | 0/47     | 2/42 (5)           | 2/21 (10)  | 2/6 (33)  | 0/59      | 1/39 (3)   | 3/39 (8)    | 3/36 (16)  | 2/33 (6)     | 0/58      | 2/5 (40)  | 1/38 (3)  |
| Cambodia   | Preah Vihear | AS 4              | 2/35 (6)       | 7/23 (30) | 3/29 (10)      | 0/50      | 2/42 (5) | 2/42 (5)           | 7/19 (37)  | 2/3 (67)  | 0/58      | 2/31 (6)   | 2/38 (5)    | 3/27 (11)  | 4/38 (11)    | 0/59      | 5/8 (63)  | 1/31 (3)  |
| Cambodia   | Ratanakiri   | AS 2              | 2/60 (3)       | 2/50 (4)  | 0/60           | 1/60 (2)  | 0/60     | 0/60               | 4/48 (8)   | -         | 0/60      | 0/60       | 0/57        | 1/44 (2)   | 0/60         | 0/60      | 1/57 (2)  | 0/42      |
| Cambodia   | Ratanakiri   | AS 4              | 0/60           | 1/50 (2)  | 0/60           | 0/60      | 0/60     | 0/60               | 1/46 (2)   | 1/5 (20)  | 0/60      | 0/58       | 0/56        | 1/39 (3)   | 0/60         | 0/60      | 1/59 (2)  | 0/48      |
| Cambodia   | Pursat       | AS 4              | 7/73 (10)      | 9/64 (14) | 2/87 (2)       | 2/116 (2) | 0/97     | 1/89 (1)           | 7/68 (10)  | 1/13 (8)  | 1/112 (1) | 2/48 (4)   | 5/51 (10)   | 8/67 (12)  | 5/78 (6)     | 0/119     | 8/25 (32) | 5/93 (5)  |

|          |             |      |           |           |      |          |      |      |           |           |          |           |          |          |      |          |           |          |
|----------|-------------|------|-----------|-----------|------|----------|------|------|-----------|-----------|----------|-----------|----------|----------|------|----------|-----------|----------|
| Vietnam  | Binh Phuoc  | AS 2 | 1/59 (2)  | 2/54 (4)  | 0/59 | 0/56     | 0/59 | 0/59 | 3/51 (6)  | 3/3 (100) | 0/59     | 0/58      | 2/47 (4) | 2/54 (4) | 0/59 | 0/59     | 6/50 (12) | 0/54     |
| Vietnam  | Binh Phuoc  | AS 4 | 1/58 (2)  | 2/55 (4)  | 0/60 | 0/58     | 0/60 | 0/60 | 5/49 (10) | 7/8 (88)  | 0/60     | 1/59 (2)  | 3/55 (5) | 1/49 (2) | 0/60 | 0/60     | 6/53 (11) | 0/52     |
| Thailand | Ranong      | AS 2 | 2/10 (20) | 1/9 (11)  | 0/10 | 0/10     | 0/10 | 0/10 | 1/9 (11)  | 3/4 (75)  | 0/10     | 1/10 (10) | 1/2 (50) | 1/9 (11) | 0/10 | 0/10     | 8/8 (100) | 1/8 (13) |
| Thailand | Ranong      | AS 4 | 3/13 (23) | 3/10 (30) | 0/13 | 0/12     | 0/13 | 0/13 | 0/13      | 2/4 (50)  | 1/13 (8) | 0/12      | 3/5 (60) | 0/7      | 0/11 | 0/13     | 6/9 (67)  | 0/10     |
| Nigeria  | Ilorin      | AS 2 | 0/16      | 0/17      | 0/18 | 0/17     | 0/18 | 0/18 | 0/18      | 0/17      | 0/18     | 0/18      | 0/18     | 0/15     | 0/18 | 0/18     | 0/16      | 1/11 (9) |
| Nigeria  | Ilorin      | AS 4 | 0/15      | 0/14      | 0/15 | 0/15     | 0/15 | 0/15 | 0/15      | -         | 0/15     | 0/15      | 0/15     | 0/15     | 0/15 | 0/15     | 0/15      | -        |
| DRC      | Kinshasa    | AS 4 | 0/40      | 0/57      | 0/22 | 3/59 (5) | 0/49 | 0/39 | 0/28      | 1/39 (3)  | 0/55     | 0/29      | 0/28     | 0/45     | 0/22 | 1/57     | 1/50 (2)  | 1/51 (2) |
| DRC      | Kinshasa    | AL   | 0/42      | 0/54      | 0/22 | 2/58 (3) | 0/47 | 0/34 | 0/23      | 0/37      | 0/53     | 0/22      | 0/22     | 0/47     | 0/11 | 0/56     | 0/47      | 1/47 (2) |
| Kenya    | Pingilikani | AS 2 | 3/44 (7)  | 1/44 (2)  | 0/56 | 2/53 (4) | 0/53 | 0/56 | 0/56      | 0/28      | 1/56 (2) | 0/49      | 0/55     | 1/56     | 0/56 | 3/54 (6) | 0/56      | 2/38 (5) |

## Notes

An adverse event is defined as either a drug-related side effect or a new (or exacerbation of a pre-existing) symptom, sign or illness

Adverse events were solicited using both open questions and a symptom checklist.

AEs tabulated above are derived from data collected on days 0,1,2,3,7 when all patients were scheduled for a follow-up visit

Data presented as n/N (%) where n is number of subjects reporting the adverse event, N is number of evaluable subjects (i.e. did not present the adverse event on enrollment)

It was not possible to assess presence of certain AEs e.g. headache, dizziness, palpitations, vision or hearing disturbance in very young children.

### 3.5 Table S5 Serious Adverse events occurring at any time during follow-up

|    | Site                | Subject ID | Description                                                                                                                                                                                                  | Relationship to study drug |
|----|---------------------|------------|--------------------------------------------------------------------------------------------------------------------------------------------------------------------------------------------------------------|----------------------------|
| 1  | Cambodia-Pailin     | KH004-008  | Acute alcohol withdrawal resulting in prolongation of hospitalisation and study discontinuation                                                                                                              | Not related                |
| 2  | Thailand-Mae Sot    | TH004-012  | Cannula site infection requiring prolongation of hospitalisation                                                                                                                                             | Not related                |
| 3  | Thailand- Ranong    | TH007-001  | Fever after parasite clearance requiring prolongation of hospitalization. No source found. Treated with antimicrobials.                                                                                      | Not related                |
| 4  | Vietnam- Binh Phuoc | VN001-024  | Patient developed respiratory symptoms after parasite clearance. Responded to broad spectrum antibiotics.                                                                                                    | Not related                |
| 5  | Vietnam- Binh Phuoc | VN001-027  | 3 year old child presenting with uncomplicated malaria and high fever. Convulsion after enrollment. Switched to severe malaria treatment and made a complete recovery in <24hours. Likely febrile convulsion | Not related                |
| 6  | Thailand- Mae Sot   | TH004-061  | Anemia requiring blood transfusion                                                                                                                                                                           | Not related                |
| 7  | Thailand- Mae Sot   | TH004-066  | Delerium secondary to acute alcohol withdrawal                                                                                                                                                               | Not related                |
| 8  | Thailand- Mae Sot   | TH004-067  | Anemia requiring blood transfusion                                                                                                                                                                           | Not related                |
| 9  | Thailand-Srisaket   | TH005-12   | Acute upper gastrointestinal bleed – referred to another hospital                                                                                                                                            | Not related                |
| 10 | Vietnam- Binh Phuoc | VN001-024  | Viral respiratory tract infection requiring prolongation of hospitalisation                                                                                                                                  | Not related                |
| 11 | Nigeria- Ilorin     | NG001-012  | Acute asthma attack requiring prolongation of hospitalisation                                                                                                                                                | Not related                |
| 12 | DRC-Kinshasa        | CD001-023  | Anaemia requiring blood transfusion                                                                                                                                                                          | Not related                |

**Notes:**

Length of follow up varied between 14 and 42 days depending on the site (see Methods)

SAEs were first notified to the Study Medical Monitor (AMD) using an initial SAE reporting form. He made an assessment of the event and the report was then emailed to all members of the DSMB within 24h of the medical monitor being notified to make an independent assessment. A final SAE reporting form was submitted once the outcome of the SAE was known. The DSMB had the final say on judging whether the event was related to the study drug or not.

#### 4. STUDY DRUGS AND DOSES:

*Artesunate 50 mg tablets:*

Pingilikani, Kenya study site. Manufactured by Guilin Pharmaceutical Co. Ltd, P.R. China, batch number:AS101001, analysed by the National Quality Control Laboratory of Kenya.

Srisaket and Ranong, Thailand sites. Manufactured by Guilin Pharmaceutical Co. Ltd, P.R. China, batch numbers:AS110102 and AS120702; repackaged by Atlantic Pharmaceutical Company, Thailand.

All other sites. Manufactured by Guilin Pharmaceutical Co. Ltd, P.R. China, batch numbers: AS101008 and AS111104.

Provided by the World Health Organisation Global Malaria Programme (Who-GMP) after quality check at the Research Institute for Industrial Pharmacy<sup>®</sup> incorporating CENQAM<sup>®</sup>, South Africa.

*Artemisinin-based combination therapies:*

Viet Nam. Dihydroartemisinin-piperaquine (Arterakine<sup>®</sup>, Pharbaco, Viet Nam)

Cambodia. Dihydroartemisinin-piperaquine (Duo-cotecxin<sup>®</sup>, Holley-Cotec, China and Eurartesim<sup>®</sup>, Sigma-Tau, Italy, donated by the manufacturers)

Myanmar, Bangladesh, Nigeria, Laos and DRC. Artemether-lumefantrine (Coartem<sup>®</sup>, Novartis, Switzerland) provided by WHO-GMP or purchased directly from Novartis Switzerland.

India. Artesunate + sulphadoxine-pyrimethamine co-blister (Medicamen Biotech Ltd, Delhi, India)

Thailand. Artesunate (as above) + mefloquine (Mequin<sup>®</sup>, Atlantic laboratories Corporation Ltd, Thailand)

#### 4.1 Table S6 Artesunate dosing table:

One tablet contains 50 mg of AS.

| Weight (kg) | 4 mg/kg (OD) |     | 2 mg/kg (OD) |     |
|-------------|--------------|-----|--------------|-----|
|             | tablets      | mL  | tablets      | mL  |
| 2           |              | 0.8 |              | 0.4 |
| 3           |              | 1.2 |              | 0.6 |
| 4           |              | 1.6 |              | 0.8 |
| 5           |              | 2.0 |              | 1.0 |
| 6           | 1/2          | 2.4 | 1/4          | 1.2 |
| 7           | 1/2          | 2.8 | 1/4          | 1.4 |
| 8           | 3/4          | 3.2 | 1/4          | 1.6 |
| 9           | 3/4          | 3.6 | 1/4          | 1.6 |
| 10          | 3/4          | 4.0 | 1/2          | 2.0 |
| 11          | 1            | 4.4 | 1/2          | 2.2 |
| 12          | 1            | 4.8 | 1/2          | 2.4 |
| 13 - 14     | 1            |     | 1/2          |     |
| 15 - 16     | 1 1/4        |     | 1/2          |     |
| 17 - 20     | 1 1/2        |     | 3/4          |     |
| 21          | 1 3/4        |     | 3/4          |     |
| 22 - 23     | 1 3/4        |     | 1            |     |
| 24 - 26     | 2            |     | 1            |     |
| 27 - 28     | 2 1/4        |     | 1            |     |
| 29          | 2 1/4        |     | 1 1/4        |     |
| 30 - 32     | 2 1/2        |     | 1 1/4        |     |
| 33 - 34     | 2 3/4        |     | 1 1/4        |     |
| 35          | 2 3/4        |     | 1 1/2        |     |
| 36 - 39     | 3            |     | 1 1/2        |     |
| 40          | 3 1/4        |     | 1 1/2        |     |
| 41 - 42     | 3 1/4        |     | 1 3/4        |     |
| 43 - 45     | 3 1/2        |     | 1 3/4        |     |
| 46          | 3 3/4        |     | 1 3/4        |     |
| 47 - 48     | 3 3/4        |     | 2            |     |
| 49 - 51     | 4            |     | 2            |     |
| 52 - 53     | 4 1/4        |     | 2            |     |
| 54          | 4 1/4        |     | 2 1/4        |     |
| 55 - 57     | 4 1/2        |     | 2 1/4        |     |
| 58 - 59     | 4 3/4        |     | 2 1/4        |     |
| 60          | 4 3/4        |     | 2 1/2        |     |
| 61 - 64     | 5            |     | 2 1/2        |     |
| 65          | 5 1/4        |     | 2 1/2        |     |
| 66 - 67     | 5 1/4        |     | 2 3/4        |     |
| 68 - 70     | 5 1/2        |     | 2 3/4        |     |

#### Instructions:

If you need to give a suspension of artesunate to young children who are unable to swallow tablets, crush 1 tablet in 5ml clean drinking water and give the volume specified in the table above. Discard any unused solution.

## 4.2 Study Artesunate certificates of analysis

Artesunate Tablets.10.05.2012.xls

|                                                                                                                                                  |                                                                                                    |                                                                                                                                                                                                                                      |                                                                                                                                                                         |
|--------------------------------------------------------------------------------------------------------------------------------------------------|----------------------------------------------------------------------------------------------------|--------------------------------------------------------------------------------------------------------------------------------------------------------------------------------------------------------------------------------------|-------------------------------------------------------------------------------------------------------------------------------------------------------------------------|
| <br><b>PASP</b><br><small>LABORATORY OF PHARMACEUTICALS</small> | <br><b>CENQAM</b> | Research Institute for Industrial<br>Pharmacy <sup>®</sup> incorporating CENQAM <sup>®</sup><br>Private Bag 30901 Potchefstroom<br>South Africa 2520<br>Tel +27 18 299 2268<br>Fax +27 18 299 2291<br>E-mail Ena.Swanepoel@rwi.ac.za | <b>CLIENT COMPANY</b><br>Global Malaria Programme<br>World Health Organization<br>20, Avenue Appia<br>CH-1211 Geneva 27<br>Switzerland<br>Contact person: Dr P Ringwald |
|                                                                                                                                                  |                                                                                                    | A SANAS Accredited Pharmaceutical Laboratory, No P0005                                                                                                                                                                               |                                                                                                                                                                         |

### CERTIFICATE OF ANALYSIS

|                            |                          |                               |                                          |
|----------------------------|--------------------------|-------------------------------|------------------------------------------|
| <b>PRODUCT:</b>            | Artesunate 50 mg Tablets | <b>MANUFACTURING COMPANY:</b> | Guilin Pharmaceuticals Co Ltd<br>(China) |
| <b>FORM:</b>               | Tablets                  | <b>CLIENT COMPANY:</b>        | WHO Switzerland                          |
| <b>BATCH NO.:</b>          | AS111104                 | <b>METHOD REFERENCE:</b>      | IPC/MET/0358                             |
| <b>SAMPLE CODE:</b>        | WHO-12-0097-ST           | <b>WORKSHEET:</b>             | 10.05.2012                               |
| <b>MANUFACTURING DATE:</b> | 11.2011                  | <b>DATE RECEIVED:</b>         | 10.05.2012                               |
| <b>EXPIRY DATE:</b>        | 11.2013                  | <b>DATE TESTED:</b>           | 20.08.2012                               |
| <b>CONTAINER:</b>          | Blistar 12's             | <b>REPORT VERSION:</b>        | 1                                        |

| TEST                                     | SPECIFICATION                                                                                                                                                                                                     | RESULT                                                                                                                                                                                                            | COMPLIANCE STATEMENT | APPROVED BY **     |
|------------------------------------------|-------------------------------------------------------------------------------------------------------------------------------------------------------------------------------------------------------------------|-------------------------------------------------------------------------------------------------------------------------------------------------------------------------------------------------------------------|----------------------|--------------------|
| <b>APPEARANCE: (Package insert)</b>      | Round white flat bevelled edge uncoated tablets. Scoreline on one side of the tablet with AS engraved on the one side of the score-line and 50 on the other side. AS 50 engraved on the other side of the tablet. | Round white flat bevelled edge uncoated tablets. Scoreline on one side of the tablet with AS engraved on the one side of the score-line and 50 on the other side. AS 50 engraved on the other side of the tablet. | Complies             | <i>[Signature]</i> |
| <b>IDENTIFICATION: (IR)<sup>††</sup></b> | The IR absorption spectrum of the precipitate exhibits maxima at the same wavelengths as that of the standard                                                                                                     | The IR absorption spectrum of the precipitate exhibits maxima at the same wavelengths as that of the standard                                                                                                     | Complies             |                    |
| <b>ASSAY: (HPLC)<sup>††</sup></b>        |                                                                                                                                                                                                                   |                                                                                                                                                                                                                   | Complies             | <i>[Signature]</i> |
| Artesunate:                              | 90.0 - 110.0 %                                                                                                                                                                                                    |                                                                                                                                                                                                                   |                      |                    |
| Sample 1:                                |                                                                                                                                                                                                                   | 98.1%                                                                                                                                                                                                             |                      |                    |
| Sample 2:                                |                                                                                                                                                                                                                   | 98.7%                                                                                                                                                                                                             |                      |                    |
| Sample 3:                                |                                                                                                                                                                                                                   | 99.3%                                                                                                                                                                                                             |                      |                    |
| Average: (%RSD)                          |                                                                                                                                                                                                                   | 98.7% (0.6%)                                                                                                                                                                                                      |                      |                    |
| <b>DISSOLUTION: (HPLC)<sup>††</sup></b>  |                                                                                                                                                                                                                   |                                                                                                                                                                                                                   |                      |                    |
| Artesunate:                              | NLT 99 % (Q) within 45 minutes                                                                                                                                                                                    |                                                                                                                                                                                                                   | Complies             | <i>[Signature]</i> |
| Vessel 1:                                |                                                                                                                                                                                                                   | 99%                                                                                                                                                                                                               |                      |                    |
| Vessel 2:                                |                                                                                                                                                                                                                   | 92%                                                                                                                                                                                                               |                      |                    |
| Vessel 3:                                |                                                                                                                                                                                                                   | 101%                                                                                                                                                                                                              |                      |                    |
| Vessel 4:                                |                                                                                                                                                                                                                   | 95%                                                                                                                                                                                                               |                      |                    |
| Vessel 5:                                |                                                                                                                                                                                                                   | 101%                                                                                                                                                                                                              |                      |                    |
| Vessel 6:                                |                                                                                                                                                                                                                   | 95%                                                                                                                                                                                                               |                      |                    |
| Average (%RSD):                          |                                                                                                                                                                                                                   | 97% (3.7)                                                                                                                                                                                                         |                      |                    |

**QC VERIFICATION AND RELEASE**

Date: 30 August 2012  
 Signature: *[Signature]*

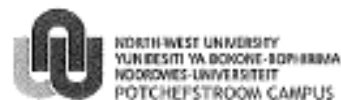

The results reported related only to the specific samples issued to and tested by the RIIPCENQAM.

Page 1 of 2

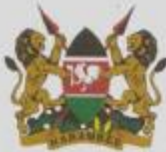

# National Quality Control Laboratory

Hospital Road, KNH Complex, P.O. Box 29726, 00202 Nairobi, Kenya  
Telephone: 2726953, +254 - 020 - 3544525/30 + Fax: 2718073  
Email: info@nqcl.go.ke Website: www.nqcl.go.ke

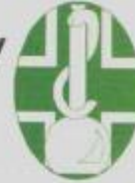

## CERTIFICATE OF ANALYSIS

CERTIFICATE No: CAN/2010/796

|                                     |                           |                                                                                                                                                                                       |               |
|-------------------------------------|---------------------------|---------------------------------------------------------------------------------------------------------------------------------------------------------------------------------------|---------------|
| <b>PRODUCT:</b>                     | ARTESUNATE TABLETS        | <b>REF. NO:</b>                                                                                                                                                                       | NDQD201011963 |
| <b>DATE RECEIVED:</b><br>24.11.2010 | <b>LABEL CLAIM:</b>       | Each tablet contains Artesunate 50 mg                                                                                                                                                 |               |
| <b>BATCH NO:</b><br>AS101001        | <b>PRESENTATION:</b>      | White coloured, circular shaped, bevel edged tablets, single scored on one face and embossed 'AS 50' on both faces, packed in a white multi dose plastic tin containing 1000 tablets. |               |
| <b>MFG. DATE:</b><br>08 Oct. 2010   | <b>MANUFACTURER:</b>      | Guilin Pharmaceutical Co., Ltd.                                                                                                                                                       |               |
| <b>EXP. DATE:</b><br>07 Oct. 2012   | <b>ADDRESS:</b>           | Not indicated.                                                                                                                                                                        |               |
| <b>CLIENT REF NO.</b>               | <b>CLIENT:</b>            | Steffen Bormann, c/o Roma Chilengi<br>c/o KEMRI-Wellcome Trust Programme,<br>P.O. Box 230 - 80108, Kilifi.                                                                            |               |
|                                     | <b>TEST(S) REQUESTED:</b> | Identification, Friability, Dissolution and Assay.                                                                                                                                    |               |

### RESULTS

| TEST                 | METHOD | COMPENDIA                      | SPECIFICATION                                                                               | DETERMINED                                                    | REMARKS  |
|----------------------|--------|--------------------------------|---------------------------------------------------------------------------------------------|---------------------------------------------------------------|----------|
| Uniformity of Weight | Weight | B.P. 2007 Vol. IV App. XII G.  | ≤ 2 tablets deviate by more than 5% from mean weight                                        | None Deviates                                                 | COMPLIES |
| Identification       | IR     | Manufacturer's In-House Method | Component HPLC peak in assay sample super-imposable with standard preparation               | Super-imposable peaks at Rf value: 4.9 ± 0.1 min              | COMPLIES |
|                      | HPLC   | Manufacturer's In-House Method | Sample IR absorption spectrum is concordant with the spectrum obtained from Artesunate ICRS | Sample IR absorption spectrum concordant with Artesunate ICRS |          |
| Friability           | Weight | B.P. 2007 Vol. IV App. XVII G. | Not more than 1.0%                                                                          | 0.2%                                                          | COMPLIES |
| Dissolution          | HPLC   | Manufacturer's In-House Method | No tablet less than 80.0% [n=6]                                                             | 83.6% (n=6; RSD=2.1%)                                         | COMPLIES |
| Assay                | HPLC   | Manufacturer's In-House Method | 95.0 - 105.0%                                                                               | 102.6% (n=9; RSD=1.8%)                                        | COMPLIES |

**CONCLUSION:** The product complies with the specifications for the tests performed.

ANALYST: MR. E. KIPRONOH  DATE: 31/12/2010  
ANALYST: DR. G. WANGANGA  DATE: 31/12/2010  
ANALYST: DR. N. MWAURA  DATE: 31/12/2010  
DIRECTOR: DR. H. K. CHEPKWONY  DATE: 31/12/2010

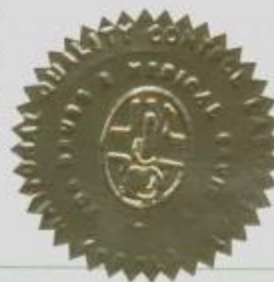

Quality Medicines Protect



## **5. LIST OF ETHICS COMMITTEES/INSTITUTIONAL REVIEW BOARDS WHICH APPROVED THE PROTOCOL:**

**Thailand:** Ethics Committee of the Faculty of Tropical Medicine, Mahidol University, 420/6 Ratchawithi Rd., Rathchadewee, Bangkok 10400, Thailand and Tak Province Community Ethics Advisory Board (T-CAB)

**India:** National Institute of Malaria Research Institutional Ethics committee, Indian Council of Medical Research, Sector 8, Dwarka, New Delhi.

**Kenya:** The Pharmacy and Poisons Board's Expert Committee on Clinical Trials Kenya Medical Research Institute Ethics Review Committee

**Cambodia:** National Ethics Committee for Health Research, Ministry of Health, Kingdom of Cambodia Institutional Review Board and National Institute of Allergy and Infectious Diseases, Bethesda, Maryland, USA

**Myanmar:** The Government of the Republic of the Union of Myanmar, Ministry of Health, Department of Medical Research (Lower Myanmar)

**Laos:** Ministry of Health. National Ethics Committee for Health Research, Lao Peoples' Democratic Republic.

**Nigeria:** Ethical Review Committee, University of Ilorin Teaching Hospital, Ilorin, Nigeria

**Bangladesh:** National Research Ethics Committee, Bangladesh Medical Research Council

**Democratic Republic of the Congo:** Republique Democratique du Congo, Ministere de l'Enseignement Superieur, Universitaire et Recherche Scientifique, Universite de Kinshasa, Ecole de Sante Publique. Comite d'Ethique.

**Viet Nam:** Ethics Committee for biomedical research of the Ministry of Health, Institute of Malariology-Parasitology-Entomology, Ho Chi Minh City

## 6. REFERENCES

Ariey, F., et al. (2014). "A molecular marker of artemisinin-resistant *Plasmodium falciparum* malaria." Nature **505**(7481): 50-55.

Manske, M., et al. (2012). "Analysis of *Plasmodium falciparum* diversity in natural infections by deep sequencing." Nature **487**(7407): 375-379.

Venkatesan, M., et al. (2012). "Using CF11 cellulose columns to inexpensively and effectively remove human DNA from *Plasmodium falciparum*-infected whole blood samples." Malar J **11**: 41.
